# Supplementary material for: Exploring Family Obligation as a Buffer Between Parental Differential Treatment and Sibling Hostility
Source: Springer Nature journal article supplement (doi:10.1007/s10826-024-02814-1), 2024-03-15
Supplement: MOESM1 [file 26867702]

| **Supplementary Table 1.**  *Age Spacing Included as a Covariate in Predicting Sibling-Directed Hostility* | | | | |
| --- | --- | --- | --- | --- |
|  | Younger Sibling | | Older Sibling | |
|  | **Step 1: R2= .14** | **Step 2: R2= .20** | **Step 1: R2= .25** | **Step 2: R2= .23** |
| *Predictor* | *b (SE)* | *b (SE)* | *b (SE)* | *b (SE)* |
| Age | -.15 (.33) | -.13 (.32) | -.25 (.32) | -.26 (.32) |
| Assigned sex | .43 (.62) | .23 (.60) | 2.06 (.61) ** | 2.05 (.62) ** |
| PDT | .17 (.05) ** | .15 (.05) ** | -.09 (.05) • | -.09 (.05) • |
| Family Obligation | -.98 (.58) • | -.88 (.56) | -.68 (.68) | -.66 (.72) |
| Age spacing | -.00 (.39) | .00 (.38) | .39 (.40) | .40 (.41) |
| Average Closeness | .08 (.10) | .05 (.10) | .14 (.09) | .14 (.09) |
| PDT x Family Obligation | — | -.13 (.07) • | — | .01 (.07) |

*Note.* SE = Standard Error; YS = Younger sibling; OS = Older sibling; PDT = Parental differential treatment. These are the unstandardized estimates for the regression model predicting sibling-directed hostility exhibited by both younger and older siblings with age spacing added as a covariate.

• p <.1, * *p* < .05, ** *p* < .01. Two-tailed significance.

| **Supplementary Table 2.**  *Marital Status Included as a Covariate in Predicting Sibling-Directed Hostility* | | | | |
| --- | --- | --- | --- | --- |
|  | Younger Sibling | | Older Sibling | |
|  | **Step 1: R2= .14** | **Step 2: R2= .21** | **Step 1: R2= .23** | **Step 2: R2= .21** |
| *Predictor* | *b (SE)* | *b (SE)* | *b (SE)* | *b (SE)* |
| Age | -.15 (.32) | -.13 (.30) | -.09 (.28) | -.09 (.29) |
| Assigned sex | .41 (.63) | .26 (.61) | 1.97 (.61) ** | 1.98 (.62) ** |
| PDT | .17 (.05) ** | .15 (.05) ** | -.10 (.05) • | -.10 (.05) • |
| Family Obligation | -.96 (.58) | -.91 (.56) | -.59 (.69) | -.59 (.73) |
| Marital Status | .10 (.75) | -.19 (.74) | .02 (.69) | .02 (.78) |
| Average Closeness | .08 (.10) | .06 (.10) | .14 (.09) | .14 (.09) |
| PDT x Family Obligation | — | -.14 (.07) * | — | -.00 (.08) |

*Note.* SE = Standard error; YS = Younger sibling; OS = Older sibling; PDT = Parental differential treatment. These are the unstandardized estimates for the regression model predicting sibling-directed hostility exhibited by both younger and older siblings with marital status added as a covariate.

• p <.1, * *p* < .05, ** *p* < .01. Two-tailed significance.

| **Supplementary Table 3.**  *Participating Parent’s Education Included as a Covariate Predicting Sibling-Directed Hostility* | | | | |
| --- | --- | --- | --- | --- |
|  | Younger Sibling | | Older Sibling | |
|  | **Step 1: R2= .15** | **Step 2: R2= .21** | **Step 1: R2= .23** | **Step 2: R2= .21** |
| *Predictor* | *b (SE)* | *b (SE)* | *b (SE)* | *b (SE)* |
| Age | -.19 (.32) | -.16 (.31) | -.10 (.28) | -.10 (.28) |
| Assigned sex | .40 (.61) | .22 (.60) | 1.98 (.61) ** | 2.01 (.62) ** |
| PDT | .17 (.05) ** | .15 (.05) ** | -.10 (.05) • | -.10 (.05) • |
| Family obligation | -.02 (.56) • | -.91 (.55) | -.61 (.68) | -.67 (.74) |
| Parent education | -.15 (.18) | -.09 (.18) | -.08 (.17) | -.10 (.19) |
| Average closeness | .09 (.10) | .06 (.10) | .14 (.09) | .15 (.09) |
| PDT x family obligation | — | -.13 (.07) • | — | -.02 (.09) |

*Note.* SE = Standard error; YS = Younger sibling; OS = Older sibling; PDT = Parental differential treatment. These are the unstandardized estimates for the regression model predicting sibling-directed hostility exhibited by both younger and older siblings with participating parent’s education added as a covariate.

• p <.1, * *p* < .05, ** *p* < .01. Two-tailed significance.

| **Supplementary Table 4.**  *Family Total Income Included as a Covariate Predicting Sibling-Directed Hostility* | | | | |
| --- | --- | --- | --- | --- |
|  | Younger Sibling | | Older Sibling | |
|  | **Step 1: R2= .14** | **Step 2: R2= .20** | **Step 1: R2= .23** | **Step 2: R2= .21** |
| *Predictor* | *b (SE)* | *b (SE)* | *b (SE)* | *b (SE)* |
| Age | -.14 (.32) | -.12 (.31) | -.10 (.29) | -.10 (.30) |
| Assigned sex | .41 (.64) | .20 (.62) | 1.97 (.61) ** | 1.97 (.63) ** |
| PDT | .17 (.05) ** | .15 (.05) ** | -.10 (.05) • | -.10 (.05) • |
| Family obligation | -.97 (.58) | -.87 (.56) | -.60 (.70) | -.59 (.73) |
| Income | -.01 (.14) | -.02 (.13) | .00 (.13) | .00 (.13) |
| Average closeness | .08 (.10) | .05 (.10) | .14 (.09) | .14 (.09) |
| PDT x family obligation | — | -.13 (.07) • | — | .00 (.08) |

*Note.* SE = Standard error; YS = Younger sibling; OS = Older sibling; PDT = Parental differential treatment. These are the unstandardized estimates for the regression model predicting sibling-directed hostility exhibited by both younger and older siblings with family total income added as a covariate.

• p <.1, * *p* < .05, ** *p* < .01. Two-tailed significance.

| **Supplementary Table 5.**  *White Race Included as a Covariate Predicting Sibling-Directed Hostility* | | | | |
| --- | --- | --- | --- | --- |
|  | Younger Sibling | | Older Sibling | |
|  | **Step 1: R2= .15** | **Step 2: R2= .22** | **Step 1: R2=.34** | **Step 2: R2= .32** |
| *Predictor* | *b (SE)* | *b (SE)* | *b (SE)* | *b (SE)* |
| Age | -.12 (.31) | -.11 (.30) | -.17 (.26) | -.17 (.26) |
| Assigned sex | .44 (.61) | .24 (.60) | 1.75 (.57) ** | 1.74 (.59) ** |
| PDT | .19 (.05) ** | .16 (.05) ** | -.13 (.05) ** | -.13 (.05) * |
| Family obligation | -.95 (.56) | -.86 (.55) | -.88 (.65) | -.85 (.68) |
| Race/ethnicity | .57 (.69) | .47 (.66) | 1.55 (.64) * | 1.56 (.65) * |
| Average closeness | .09 (.10) | .06 (.10) | .17 (.08) * | .17 (.09) • |
| PDT x family obligation | — | -.13 (.07) • | — | .01 (.07) |

*Note.* SE = Standard error; YS = Younger sibling; OS = Older sibling; PDT = Parental differential treatment. These are the unstandardized estimates for the regression model predicting sibling-directed hostility exhibited by both younger and older siblings with White, non Latine race/ethnicity added as a covariate. Race/ethnicity coded as White vs. non-White due to sample size restrictions.

• p <.1, * *p* < .05, ** *p* < .01. Two-tailed significance.
